# Supplementary material for: CBM: An IoT Enabled LiDAR Sensor for In-Field Crop Height and Biomass Measurements
Source: MDPI journal article supplement (doi:10.3390/bios12010016), 2021-12-29
Supplement: s1 [file s1]

## Article

# CBM: An IoT Enabled LiDAR Sensor for In-Field Crop Height and Biomass Measurements

Bikram Pratap Banerjee <sup>1</sup>, German Spangenberg <sup>2,3</sup> and Surya Kant <sup>1,2,3,\*</sup>

<sup>1</sup> Agriculture Victoria, Grains Innovation Park, Horsham VIC 3400, Australia; bikram.banerjee@agriculture.vic.gov.au

<sup>2</sup> Agriculture Victoria, AgriBio, Centre for AgriBioscience, Bundoora VIC 3083, Australia; german.spangenberg@agriculture.vic.gov.au

<sup>3</sup> School of Applied Systems Biology, La Trobe University, Bundoora VIC 3083, Australia

\* Correspondence: surya.kant@agriculture.vic.gov.au; Tel.: +61-3-4344-3179

**Table S1.** List of primary parameters for the 3D printer.

| Sr. No. | Parameters              | Values  |
|---------|-------------------------|---------|
| 1       | Layer Height            | 0.1 m   |
| 2       | Wall thickness          | 1.2 m   |
| 3       | Infill Density          | 100%    |
| 4       | Infill Pattern          | Cubic   |
| 5       | Printing Temperature    | 245 °C  |
| 6       | Build Plate Temperature | 85 °C   |
| 7       | Print Speed             | 25 mm/s |
| 8       | Cooling Fan speed       | 20 %    |

3D printer (Ultimaker S5, Geldermalsen, The Netherlands).

**Table S2.** Wheat genotypes used in the field trial.

| Sr. No. | Wheat Genotypes   | Growth Type |
|---------|-------------------|-------------|
| 1       | Aus27214          | Spring      |
| 2       | Aus428            | Spring      |
| 3       | Aus27919          | Spring      |
| 4       | Aus27319          | Spring      |
| 5       | Aus79             | Spring      |
| 6       | HOPE              | Spring      |
| 7       | Aus27919          | Spring      |
| 8       | 7992              | Spring      |
| 9       | 31B-55            | Spring      |
| 10      | Aus26558          | Spring      |
| 11      | A4920-52P-2P-2P   | Spring      |
| 12      | Aus28110          | Spring      |
| 13      | Aus27258          | Spring      |
| 14      | 178/89            | Spring      |
| 15      | Cara              | Spring      |
| 16      | Aus28232          | Spring      |
| 17      | SKOROSPELKA Aus36 | Spring      |
| 18      | Aus28040          | Spring      |
| 19      | Yitpi             | Spring      |
| 20      | DIAMOND           | Spring      |
| 21      | KLEIN DON ENRIQUE | Spring      |
| 22      | Emma              | Spring      |
| 23      | Aus27959          | Spring      |
| 24      | Aus27858          | Spring      |
| 25      | Aus17             | Spring      |
| 26      | MAGPIE S          | Spring      |
| 27      | HINDI 12          | Spring      |

---

|    |                  |        |
|----|------------------|--------|
| 28 | KLEIN EXITO      | Spring |
| 29 | Petirrojo        | Spring |
| 30 | VALKI 141-R-E-34 | Spring |
| 31 | KM 780-92        | Spring |
| 32 | Ballobar         | Spring |
| 33 | Aus27813         | Spring |
| 34 | Aus27429         | Spring |
| 35 | Aus28050         | Spring |
| 36 | Aus27454         | Spring |

---
